# Supplementary material
Source: PubMed Central journal article supplement (PMC4995916)
Supplement: IAI.01514-15_zii999091804so1.pdf [file IAI.01514-15_zii999091804so1.pdf]

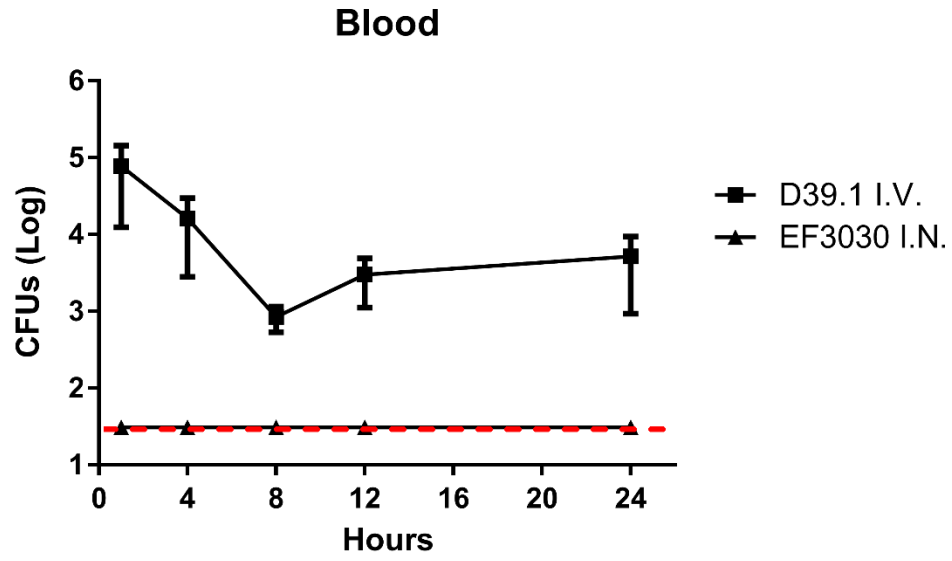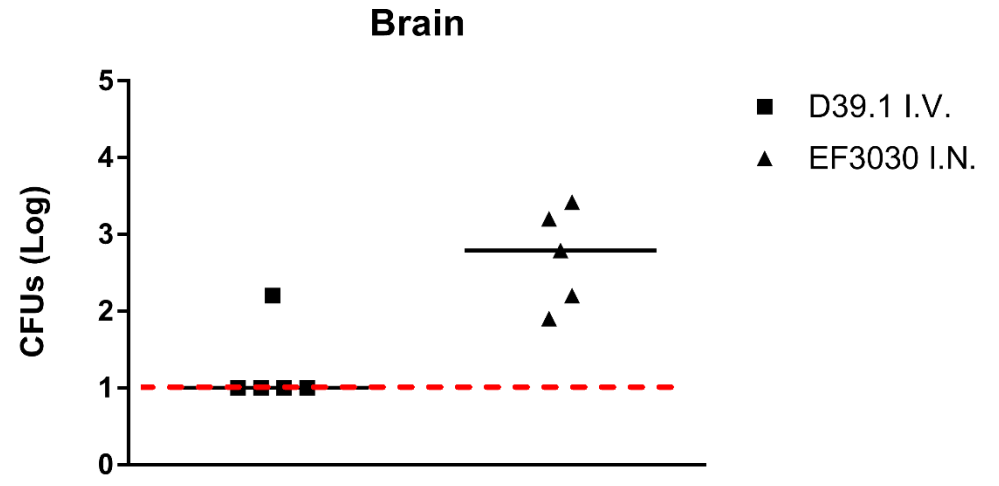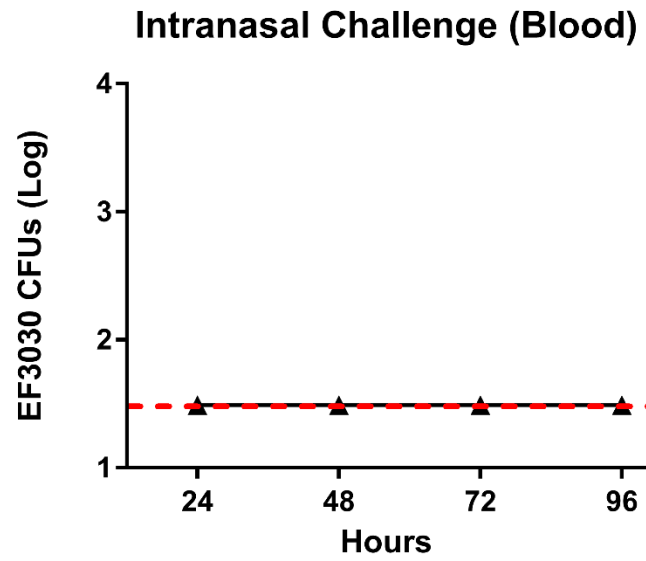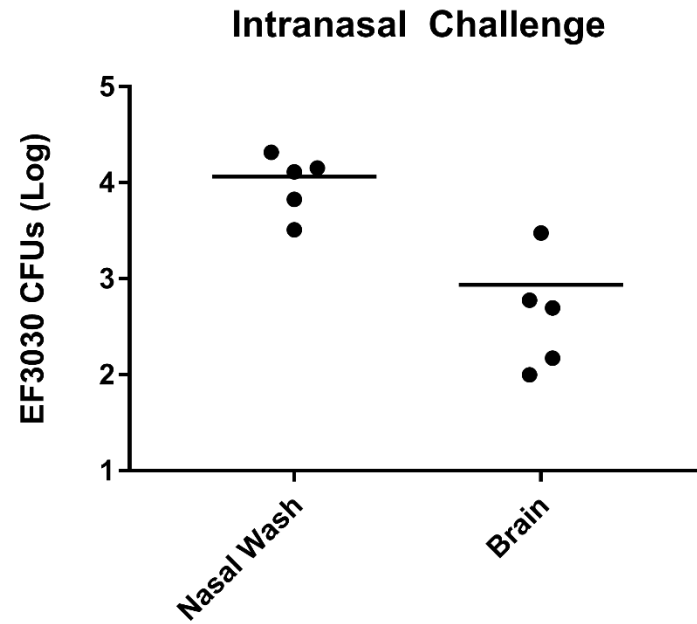

Figure S1: 8-12 week old C57BL/6 mice were challenged with either D39.1 ( $1 \times 10^6$  CFUs) or EF3030 ( $1 \times 10^7$  CFUs). Blood samples were taken at 1, 4, 8, 12, and 24 hours. After 24 hours the brains were removed and CFUs enumerated (top). Mice were challenged intranasally with EF3030 ( $1 \times 10^7$  CFUs) and blood samples were taken at 24, 48, 72, and 96 hours (bottom). Lower limit of detection is represented by red dashed line. (intranasal = i.n.; intravenous = i.v.)

**Brain**

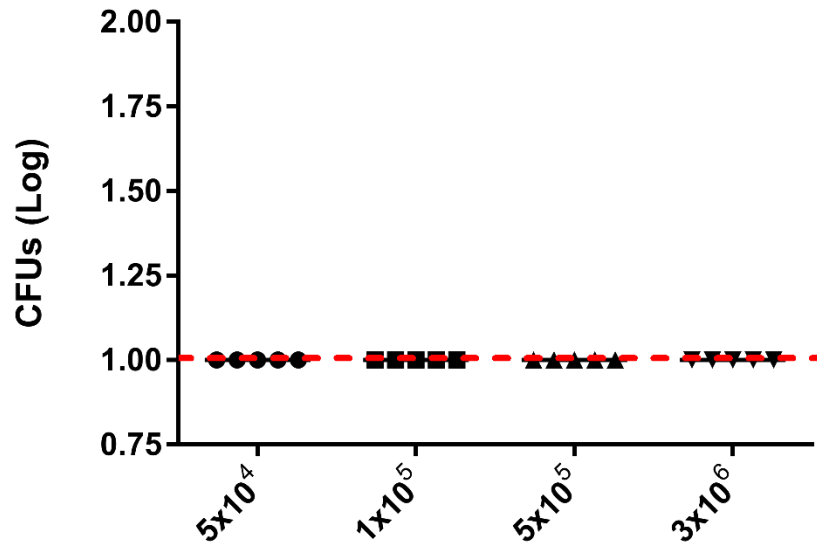

**Blood**

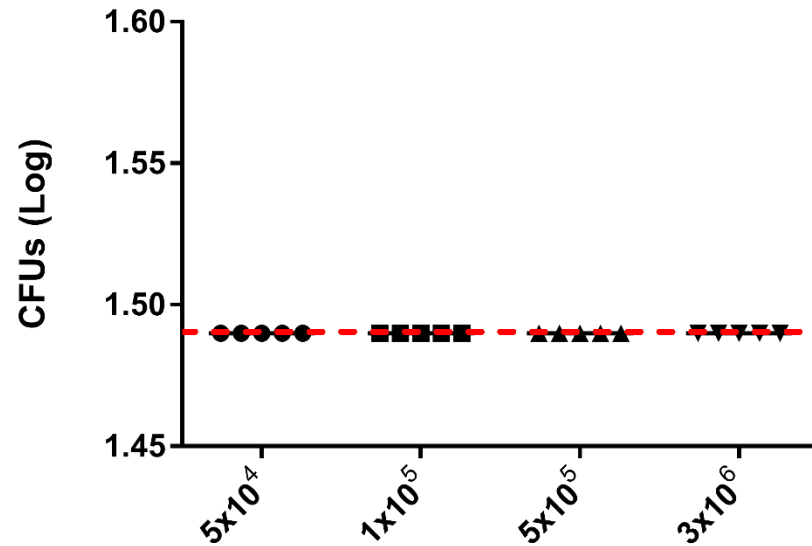

**Spleen**

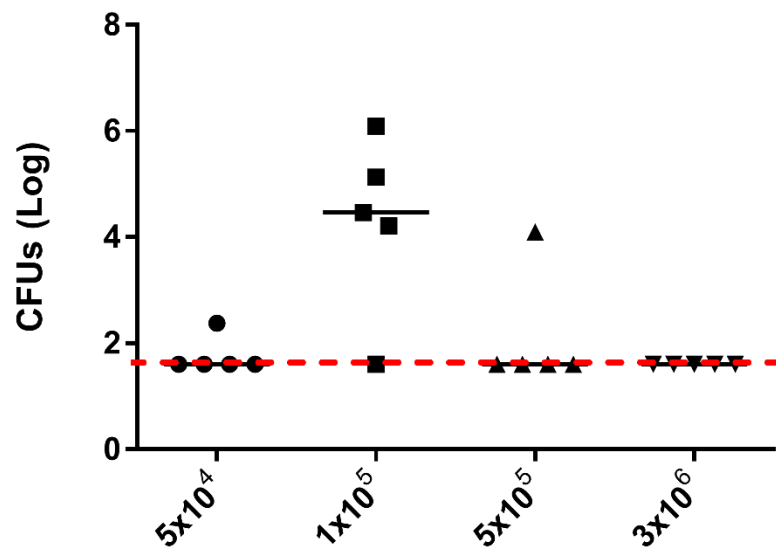

**Liver**

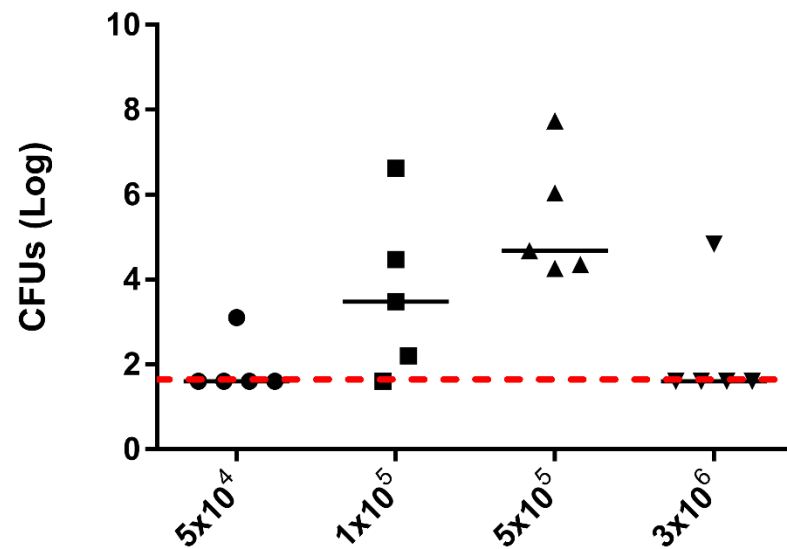

Figure S2: 8-12 week old C57BL/6 mice were challenged with increasing amounts of EF3030 intravenously and the ability to detect CFUs in the blood, spleen, liver, and brain were assessed after 4 days.
